# Supplementary material for: Distribution of Toxinogenic Methicillin-Resistant and Methicillin-Susceptible Staphylococcus aureus from Different Ecological Niches in Algeria
Source: PubMed Central journal article supplement (PMC6784135; doi:10.3390/toxins11090500), 2019-08-28
Supplement: toxins-11-00500-s001.pdf [file toxins-11-00500-s001.pdf]

# Supplementary Materials: Distribution of Toxinogenic Methicillin-Resistant and Methicillin-Susceptible *Staphylococcus aureus* From Different Ecological Niches in Algeria

Assia Mairi, Abdelaziz Touati, Alix Pantel, Karima Zenati, Alex Yahiaoui Martinez, Catherine Dunyach-Remy, Albert Sotto and Jean-Philippe Lavigne

**Table S1.** Numbers and distribution of samples collected from different ecological niches in 12 Algerian provinces.

| Provinces          | Samples Collected (n) | <i>Staphylococcus aureus</i> (n) |
|--------------------|-----------------------|----------------------------------|
| Bejaia             | 770                   | 155                              |
| Bordj Bou Arreridj | 194                   | 21                               |
| Bouira             | 169                   | 16                               |
| Jijel              | 135                   | 14                               |
| Mila               | 145                   | 11                               |
| Tizi Ouzou         | 173                   | 18                               |
| Setif              | 145                   | 11                               |
| Alger              | 200                   | 19                               |
| Boumerdes          | 124                   | 10                               |
| M'Sila             | 151                   | 13                               |
| Constantine        | 143                   | 10                               |
| Batna              | 97                    | 14                               |
| <b>Total</b>       | <b>2446</b>           | <b>312</b>                       |

**Table S2.** Numbers and distribution of samples in the different ecological niches in Algeria.

| Niches                       | Samples Collected (n) | <i>Staphylococcus aureus</i> (n) |
|------------------------------|-----------------------|----------------------------------|
| Animals                      | 1780                  | 224                              |
| Farm animals (nasal samples) | 800                   | 144                              |
| Bovine                       | 196                   | 18                               |
| Broilers                     | 126                   | 4                                |
| Goats                        | 67                    | 8                                |
| Laying hens                  | 141                   | 59                               |
| Ovine                        | 184                   | 34                               |
| Rabbits                      | 41                    | 15                               |
| Turkeys                      | 45                    | 6                                |
| Pets (nasal samples)         | 328                   | 46                               |
| Cats                         | 90                    | 17                               |
| Dogs                         | 149                   | 23                               |
| Horses                       | 89                    | 6                                |
| Wild animals (fecal samples) | 652                   | 34                               |
| Wild birds                   | 237                   | 18                               |
| Wild fish                    | 182                   | 6                                |
| Barbary macaques             | 65                    | 1                                |
| Wild Boars                   | 65                    | 5                                |
| Barbarous deer               | 37                    | 0                                |
| Jackal                       | 16                    | 0                                |
| Hares                        | 27                    | 2                                |
| Wolves                       | 10                    | 0                                |
| Porcupine                    | 13                    | 2                                |

---

|                               |      |     |
|-------------------------------|------|-----|
| Food products (fresh samples) | 276  | 24  |
| Chicken carcasses             | 20   | 0   |
| Chicken offal's               | 45   | 2   |
| Goat milk                     | 32   | 2   |
| Cow milk                      | 46   | 7   |
| Meat                          | 49   | 4   |
| Sausages                      | 24   | 2   |
| Table eggs                    | 60   | 7   |
| Human (nasal samples)         | 316  | 61  |
| Pets owners                   | 181  | 24  |
| Farmers                       | 35   | 12  |
| Volunteers in community       | 100  | 25  |
| Aquatic environment (water)   | 74   | 3   |
| Total                         | 2446 | 312 |

---

**Table S3.** Characteristics of MSSA strains isolated from different niches in Algeria.

| Strain | Origin                         | Date of Sampling | Sampling Type | Localisation                  | AMR Profiles | PVL Content | TSST Content | Et Content | Other Toxin Genes Detected                                                      | agr type | MLST  |
|--------|--------------------------------|------------------|---------------|-------------------------------|--------------|-------------|--------------|------------|---------------------------------------------------------------------------------|----------|-------|
| S46    | Bovine ( <i>Bos taurus</i> )   | 22/04/2018       | Nasal         | Bourdj Bou Arreridj (Khelil)  | -            | +           | -            | -          | <i>sea, seb, sei, hla, hld, hlg, hlg2, clfB, fib</i>                            | 1        | ST6   |
| S47    | Bovine ( <i>Bos taurus</i> )   | 06/02/2018       | Nasal         | Bejaia (Boukhelifa)           | PNG1-KMN     | +           | -            | -          | <i>seb, hla, hld, hlg, hlg2, clfB, fib</i>                                      | 1        | ST97  |
| S77    | Ovine ( <i>Ovis aries</i> )    | 11/07/2018       | Nasal         | Bouira                        | PNG1         | +           | +            | -          | <i>sea, hla, hld, hlg, hlg2, clfB, fib, fnbA, fnbB</i>                          | 1        | ST6   |
| S78    | Ovine ( <i>Ovis aries</i> )    | 01/02/2018       | Nasal         | Setif                         | PNG1         | +           | -            | -          | <i>hla, hld, hlg, hlg2, clfB, fnbA, fnbB</i>                                    | 1        | ST398 |
| S155   | Laying hens                    | 02/05/2018       | Oral          | Tizi Ouzou                    | PNG1         | +           | -            | -          | <i>sea, sei, clfB, fib, fnbA, fnbB, edinB, hla, hld, hlg, hlg2</i>              | 1        | ST6   |
| S156   | Laying hens                    | 22/04/2018       | Oral          | Bourdj Bou Arreridj (Khelil)  | PNG1         | +           | -            | -          | <i>sea, sei, clfB, fib, fnbA, fnbB, edinB, hla, hld, hlg, hlg2</i>              | 1        | ST6   |
| S157   | Laying hens                    | 16/04/2018       | Rectal        | Bejaia (Timezrit)             | PNG1         | +           | -            | -          | <i>sea, sei, clfB, fib, fnbA, fnbB, edinB, hla, hld, hlg, hlg2</i>              | 1        | ST6   |
| S158   | Laying hens                    | 18/04/2018       | Rectal        | Bejaia (Beni Ksila)           | -            | +           | -            | -          | <i>clfB, fib, fnbA, fnbB, hla, hld, hlg, hlg2</i>                               | 2        | ST15  |
| S181   | Cat                            | 04/02/2018       | Nasal         | Bejaia                        | PNG1         | +           | +            | -          | <i>sea, seg, seh, sei, hla, hld, hlg, hlg2, clfB, fib, fnbA, fnbB, edinB</i>    | 1        | ST6   |
| S215   | Horse owner                    | 18/02/2018       | Nasal         | Constantine                   | PNG1-FAD     | +           | +            | -          | <i>sea, seh, sek, seq, hla, hlb, hld, hlg, hlg2, clfB, fib, cna, fnbA, fnbB</i> | 3        | ST1   |
| S242   | Farmer                         | 26/04/2018       | Nasal         | Bejaia (Akbou)                | PNG1         | +           | -            | -          | <i>sea, hla, hld, hlg, hlg2, clfB, fib, fnbA, fnbB</i>                          | 1        | ST6   |
| S243   | Farmer                         | 02/03/2018       | Nasal         | Algiers (Baraki)              | PNG1         | +           | +            | -          | <i>hla, hld, hlg, hlg2, clfB, fib, fnbA, fnbB</i>                               | 3        | ST1   |
| S244   | Farmer                         | 11/07/2018       | Nasal         | Bouira                        | PNG1         | +           | +            | -          | <i>hld, hlg, hlg2, clfB, fib, fnbB</i>                                          | 3        | ST942 |
| S30    | Hare ( <i>Lepus capensis</i> ) | 20/06/2018       | Feces         | Bejaia (Akkfadou)             | PNG1         | -           | +            | -          | <i>fnbB, clfB, fib, sea, sek, sei, seg, seq, seh, hla, hld, hlg, hlg2</i>       | 2        | ST15  |
| S31    | Bovine ( <i>Bos taurus</i> )   | 13/02/2018       | Nasal         | Bejaia (Beni Maouche)         | -            | -           | +            | -          | <i>clfB, fib, sec, sei, seg, hla, hlb, hld, hlg, hlg2</i>                       | 1        | ST188 |
| S38    | Bovine ( <i>Bos taurus</i> )   | 13/02/2018       | Nasal         | Bejaia (Beni Maouche)         | -            | -           | +            | -          | <i>fnbA, clfB, fib, sec, sei, seg, hla, hld, hlg2</i>                           | 2        | ST151 |
| S51    | Ovine ( <i>Ovis aries</i> )    | 22/04/2018       | Nasal         | Bourdj Bou Arreridj (Zemoura) | -            | -           | +            | -          | <i>fnbB, clfB, fib, sea, sec, sei, edin, hla, hlb, hld, hlg</i>                 | 1        | ST700 |
| S54    | Ovine ( <i>Ovis aries</i> )    | 11/07/2018       | Nasal         | Bouira                        | PNG1         | -           | +            | -          | <i>fnbB, clfB, fib, sea, sec, sei, edin, hld, hlg, hlg2</i>                     | 1        | ST291 |
| S56    | Ovine ( <i>Ovis aries</i> )    | 24/04/2018       | Nasal         | Mila                          | PNG1         | -           | +            | -          | <i>fnbB, clfB, fib, seb, sec, sei, edinB, hla, hld, hlg, hlg2</i>               | 1        | ST97  |

|      |                                       |            |        |                              |      |   |   |   |                                                                                |   |       |
|------|---------------------------------------|------------|--------|------------------------------|------|---|---|---|--------------------------------------------------------------------------------|---|-------|
| S57  | Ovine ( <i>Ovis aries</i> )           | 01/02/2018 | Nasal  | Setif                        | PNG1 | - | + | - | <i>fnbA, clfB, fib, sec, sei, seg, edinB, hla, hld, hlg, hlg2</i>              | 2 | ST15  |
| S60  | Ovine ( <i>Ovis aries</i> )           | 12/02/2018 | Nasal  | Bejaia (Ighezar Amokrane)    | PNG1 | - | + | - | <i>fnbB, clfB, fib, sec, sei, hla, hlb, hld, hlg, hld2</i>                     | 1 | ST8   |
| S62  | Ovine ( <i>Ovis aries</i> )           | 30/06/2018 | Nasal  | Mila                         | PNG1 | - | + | - | <i>fnbB, clfB, fib, sec, sei, seg, edinB, hla, hlb, hld, hlg</i>               | 2 | ST151 |
| S63  | Ovine ( <i>Ovis aries</i> )           | 24/04/2018 | Nasal  | Mila                         | -    | - | + | - | <i>clfB, fib, sec, sei, seh, edinB, hla, hlb, hld, hlg2</i>                    | 3 | ST700 |
| S65  | Ovine ( <i>Ovis aries</i> )           | 06/02/2018 | Nasal  | Bejaia (Boukhelifa)          | PNG1 | - | + | - | <i>fnbB, clfB, fib, seb, sei, seg, hla, hlb, hld, hlg, hlg2</i>                | 1 | ST6   |
| S73  | Ovine ( <i>Ovis aries</i> )           | 17/02/2018 | Nasal  | Bousaada                     | -    | - | + | - | <i>clfB, fib, sec, sei, edinB, hla, hlb, hld, hlg2</i>                         | 3 | ST700 |
| S74  | Ovine ( <i>Ovis aries</i> )           | 17/02/2018 | Nasal  | Bousaada                     | -    | - | + | - | <i>fnbA, clfB, fib, seb, sec, sei, seg, hla, hlb, hld, hlg, hlg2</i>           | 1 | ST6   |
| S75  | Ovine ( <i>Ovis aries</i> )           | 06/02/2018 | Nasal  | Bejaia (Boukhelifa)          | -    | - | + | - | <i>clfB, fib, sec, sei, seg, hla, hlb, hld, hlg, hlg2</i>                      | 1 | ST6   |
| S76  | Ovine ( <i>Ovis aries</i> )           | 12/02/2018 | Nasal  | Bejaia (Sidi Aich)           | -    | - | + | - | <i>fnbA, fnbB, clfB, fib, sec, sei, seg</i>                                    | 3 | ST151 |
| S79  | Goat ( <i>Capra hircus</i> )          | 11/02/2018 | Nasal  | Bejaia (Sidi Aich)           | -    | - | + | - | <i>fnbB, clfB, fib, sea, sei, edinB, hla, hld, hlg, hlg2</i>                   | 1 | ST97  |
| S80  | Goat ( <i>Capra hircus</i> )          | 24/05/2018 | Nasal  | Jijel                        | -    | - | + | - | <i>clfB, fib, sea, sec, sei, edinB, hla, hlb, hld, hlg, hlg2</i>               | 1 | ST6   |
| S88  | Goat ( <i>Capra aegagrus hircus</i> ) | 02/05/2018 | Nasal  | Tizi Ouzou                   | -    | - | + | - | <i>fnbA, clfB, fib, sei, seg, hla, hlb, hld, hlg, hlg2</i>                     | 1 | ST6   |
| S92  | Rabbit                                | 25/04/2018 | Nasal  | Bejaia (Barbacha)            | PNG1 | - | + | - | <i>fnbB, clfB, fib, sea, sec, sei, edinB, hla, hld, hlg, hlg2</i>              | 1 | ST194 |
| S94  | Rabbit                                | 09/02/2018 | Nasal  | Bejaia (Ouzellaguen)         | PNG1 | - | + | + | <i>clfB, fib, etb, sea, sec, sei, edinB, hla, hld, hlg, hlg2</i>               | 1 | ST6   |
| S117 | Laying hens                           | 10/02/2018 | Rectal | Bejaia (Tazmalt)             | PNG1 | - | + | + | <i>fnbB, clfB, fib, eta, sea, sek, sei, seg, sek, hla, hld, hlg, hlg2</i>      | 1 | ST398 |
| S135 | Laying hens                           | 16/04/2018 | Rectal | Bejaia (Timezrit)            | PNG1 | - | + | + | <i>clfB, fib, etb, sea, sei, seg, hla, hld, hlg, hlg2</i>                      | 1 | ST97  |
| S138 | Laying hens                           | 16/04/2018 | Oral   | Bejaia (Timezrit)            | PNG1 | - | + | - | <i>fnbA, clfB, fib, sea, sei, seg, edinB, hla, hld, hlg, hlg2</i>              | 1 | ST6   |
| S145 | Laying hens                           | 22/04/2018 | Oral   | Bourdj Bou Arreridj (Khelil) | -    | - | + | + | <i>fnbA, clfB, fib, etb, sea, sei, seg, hla, hld, hlg, hlg2</i>                | 1 | ST6   |
| S152 | Laying hens                           | 19/05/2018 | Oral   | Batna                        | -    | - | + | - | <i>fnbB, clfB, fib, sea, sek, sei, seg, seq, seh, hla, hlb, hld, hlg, hlg2</i> | 1 | ST6   |
| S173 | Cat                                   | 10/05/2018 | Nasal  | Boumerdes                    | PNG1 | - | + | - | <i>clfB, sei, seg, hla, hld, hlg2</i>                                          | 2 | ST22  |
| S187 | Dog                                   | 21/02/2018 | Nasal  | Bejaia                       | PNG1 | - | + | - | <i>fnbB, clfB, fib, sea, sei, seg, sed, edinB, hla, hlb, hld, hlg, hlg2</i>    | 1 | ST15  |

|      |                   |            |       |                       |      |   |   |   |                                                                                       |   |        |
|------|-------------------|------------|-------|-----------------------|------|---|---|---|---------------------------------------------------------------------------------------|---|--------|
| S194 | Dog               | 21/04/2018 | Nasal | Bejaia (El Kseur)     | -    | - | + | - | <i>clfB, fib, sea, sek, sei, seg, seq, seh, hla, hlb, hld, hlg, hlg2</i>              | 1 | ST6    |
| S200 | Dog               | 01/05/2018 | Nasal | Tizi Ouzou            | PNG1 | - | + | - | <i>clfB, sea, sei, seg, sed, hld, hlg2</i>                                            | 3 | ST34   |
| S206 | Horse             | 18/02/2018 | Nasal | Constantine           | PNG1 | - | + | - | <i>clfB, fib, sea, sek, sei, seg, seq, seh, hla, hlb, hld, hlg, hlg2</i>              | 3 | ST1    |
| S209 | Horse             | 07/03/2018 | Nasal | Algiers (Bouchaoui)   | -    | - | + | - | <i>clfB, fib, sea, sek, sei, seh, hla, hld, hlg, hlg2</i>                             | 1 | ST133  |
| S213 | Horse owner       | 07/05/2018 | Nasal | Bejaia (Adekar)       | -    | - | + | - | <i>fnbA, clfB, fib, sea, sei, seh, hla, hlb, hld, hlg, hlg2</i>                       | 1 | ST573  |
| S214 | Horse owner       | 01/02/2018 | Nasal | Setif                 | -    | - | + | - | <i>fnbB, clfB, sei, seg, edinB, hld, hlg, hlg2</i>                                    | 1 | ST291  |
| S216 | Cat owner         | 04/02/2018 | Nasal | Bejaia                | PNG1 | - | + | - | <i>fnbB, clfB, fib, sea, sek, sei, seg, seq, seh, edinB, hla, hlb, hld, hlg, hlg2</i> | 3 | ST291  |
| S217 | Cat owner         | 21/02/2018 | Nasal | Bejaia                | PNG1 | - | + | - | <i>fnbB, clfB, fib, sea, sek, sei, seg, seq, seh, edinB, hla, hld, hlg, hlg2</i>      | 3 | ST4723 |
| S218 | Cat owner         | 12/02/2018 | Nasal | Bejaia                | PNG1 | - | + | - | <i>clfB, fib, sea, sek, sei, seg, seq, sed, hla, hld, hlg, hlg2</i>                   | 1 | ST217  |
| S220 | Dog owner         | 21/04/2018 | Nasal | Bejaia (El Kseur)     | -    | - | + | - | <i>fnbB, clfB, fib, sea, sei, seg, seh, hla, hld, hlg, hlg2</i>                       | 1 | ST6    |
| S222 | Dog owner         | 22/04/2018 | Nasal | Bejaia                | PNG1 | - | + | - | <i>clfB, sei, seg, hld, hlg2</i>                                                      | 1 | ST30   |
| S223 | Dog owner         | 22/04/2018 | Nasal | Bejaia (Amizour)      | PNG1 | - | + | - | <i>clfB, sei, seg, hla, hld, hlg2</i>                                                 | 2 | ST30   |
| S228 | Dog owner         | 17/04/2018 | Nasal | Bejaia                | -    | - | + | - | <i>fnbA, clfB, fib, sea, sek, sei, seh, hla, hlb, hld, hlg, hlg2</i>                  | 1 | ST6    |
| S232 | Dog owner         | 22/04/2018 | Nasal | Bejaia                | PNG1 | - | + | - | <i>clfB, fib, sei, seg, hla, hlb, hld, hlg2</i>                                       | 3 | ST30   |
| S233 | Farmer            | 17/02/2018 | Nasal | Bousaada              | PNG1 | - | + | - | <i>fnbB, clfB, fib, seb, sei, edinB, hla, hld, hlg, hlg2</i>                          | 1 | ST97   |
| S238 | Farmer            | 28/04/2018 | Nasal | Bejaia (Beni Maouche) | PNG1 | - | + | + | <i>fnbA, clfB, fib, etb, sea, seb, sei, seg, hla, hld, hlg, hlg2</i>                  | 1 | ST97   |
| S247 | Human (Community) | 10/05/2018 | Nasal | Boumerdes             | PNG1 | - | + | - | <i>fnbB, clfB, fib, sea, sek, sei, seg, seq, seh, hla, hld, hlg, hlg2</i>             | 1 | ST199  |
| S248 | Human (Community) | 24/02/2018 | Nasal | Bejaia (El Kseur)     | PNG1 | - | + | - | <i>fnbB, clfB, fib, sea, sek, sei, seg, seq, seh, hla, hld, hlg, hlg2</i>             | 1 | ST573  |
| S249 | Human (Community) | 29/03/2018 | Nasal | Bejaia (Oued Ghir)    | PNG1 | - | + | - | <i>fnbB, clfB, fib, sea, sek, sei, seg, seq, seh, hla, hld, hlg, hlg2</i>             | 1 | ST1    |
| S256 | Human (Community) | 01/02/2018 | Nasal | Setif                 | PNG1 | - | + | - | <i>clfB, fib, sei, seg, seh, hla, hld, hlg, hlg2</i>                                  | 3 | ST34   |
| S258 | Human (Community) | 13/01/2018 | Nasal | Setif                 | PNG1 | - | + | - | <i>fnbB, clfB, sea, sei, seg, edinB, hld, hlg2</i>                                    | 1 | ST291  |

|      |                   |            |                  |                       |              |   |   |   |                                                                        |   |        |
|------|-------------------|------------|------------------|-----------------------|--------------|---|---|---|------------------------------------------------------------------------|---|--------|
| S259 | Human (Community) | 16/01/2018 | Nasal            | Setif                 | PNG1         | - | + | - | <i>clfB, sea, sei, seg, hld, hlg2</i>                                  | 3 | ST30   |
| S260 | Human (Community) | 02/05/2018 | Nasal            | Tizi Ouzou            | PNG1         | - | + | - | <i>clfB, fib, sei, seg, seh, hla, hld, hlg2</i>                        | 1 | ST22   |
| S262 | Human (Community) | 17/02/2018 | Nasal            | Bousaada              | PNG1         | - | + | - | <i>clfB, sec, sei, seg, hla, hld, hlg2</i>                             | 1 | ST22   |
| S263 | Human (Community) | 10/05/2018 | Nasal            | Boumerdes             | PNG1         | - | + | - | <i>fnbB, clfB, fib, sei, seg, hla, hlb, hld, hlg, hlg2</i>             | 3 | ST30   |
| S264 | Human (Community) | 01/05/2018 | Nasal            | Tizi Ouzou            | PNG1         | - | + | + | <i>fnbB, clfB, fib, eta, sea, sei, seg, hla, hlb, hld, hlg, hlg2</i>   | 3 | ST4685 |
| S265 | Human (Community) | 10/05/2018 | Nasal            | Boumerdes             | PNG1         | - | + | - | <i>fnbA, clfB, fib, sea, sei, seg, hla, hld, hlg, hlg2</i>             | 3 | ST30   |
| S279 | Cow milk          | 06/02/2018 | Milk             | Bejaia (Boukhelifa)   | PNG1-KMN-TMN | - | + | - | <i>clfB, fib, seb, sec, sei, edinB, hla, hld, hlg, hlg2</i>            | 1 | ST7    |
| S281 | Goat milk         | 11/02/2018 | Milk             | Bejaia (Sidi Aich)    | -            | - | + | - | <i>fnbB, clfB, fib, sea, sec, sei, edinB, hla, hlb, hld, hlg, hlg2</i> | 1 | ST6    |
| S287 | Table egg         | 02/03/2018 | Surface swabbing | Algiers (Baraki)      | -            | - | + | - | <i>fnbB, clfB, fib, seb, sek, sei, seg, seq, hla, hld, hlg, hlg2</i>   | 1 | ST97   |
| S95  | Rabbit            | 02/05/2018 | Nasal            | Tizi Ouzou            | PNG1         | - | - | + | <i>fnbA, clfB, fib, etb, sea, sei, hla, hld, hlg, hlg2</i>             | 1 | ST6    |
| S102 | Laying hens       | 02/05/2018 | Rectal           | Tizi Ouzou            | PNG1         | - | - | + | <i>clfB, fib, etb, sea, sei, seg, hla, hld, hlg, hlg2</i>              | 1 | ST97   |
| S104 | Laying hens       | 26/04/2018 | Rectal           | Bejaia (Akbou)        | -            | - | - | + | <i>clfB, fib, etb, sea, sei, seg, hla, hld, hlg, hlg2</i>              | 1 | ST6    |
| S107 | Laying hens       | 26/04/2018 | Rectal           | Bejaia (Akbou)        | PNG1         | - | - | + | <i>clfB, fib, eta, sei, seg, hla, hld, hlg, hlg2</i>                   | 4 | ST121  |
| S108 | Laying hens       | 17/02/2018 | Rectal           | Bousaada              | PNG1         | - | - | + | <i>fnbB, clfB, fib, eta, sea, sei, seg, hla, hld, hlg, hlg2</i>        | 1 | ST398  |
| S109 | Laying hens       | 17/02/2018 | Rectal           | Bousaada              | PNG1         | - | - | + | <i>clfB, fib, etb, sea, sei, seg, hla, hld, hlg, hlg2</i>              | 1 | ST6    |
| S111 | Laying hens       | 28/04/2018 | Rectal           | Bejaia (Beni Maouche) | PNG1         | - | - | + | <i>clfB, fib, etb, sei, seg, hla, hld, hlg, hlg2</i>                   | 4 | ST121  |
| S115 | Laying hens       | 28/04/2018 | Rectal           | Bejaia (Ighil Ali)    | PNG1         | - | - | + | <i>fnbB, clfB, fib, etb, sea, sei, seg, hla, hld, hlg, hlg2</i>        | 1 | ST398  |
| S122 | Laying hens       | 26/04/2018 | Oral             | Bejaia (Akbou)        | PNG1         | - | - | + | <i>fnbB, clfB, fib, eta, sea, seb, sei, seg, hla, hld, hlg, hlg2</i>   | 1 | ST398  |
| S124 | Laying hens       | 18/04/2018 | Rectal           | Bejaia (Amizour)      | PNG1         | - | - | + | <i>clfB, fib, etb, sea, sei, seg, hla, hld, hlg, hlg2</i>              | 1 | ST6    |
| S125 | Laying hens       | 02/05/2018 | Oral             | Tizi Ouzou            | PNG1         | - | - | + | <i>clfB, fib, etb, sea, sei, seg, hla, hld, hlg, hlg2</i>              | 1 | ST6    |

|      |                                    |            |                  |                       |                 |   |   |   |                                                                           |   |        |
|------|------------------------------------|------------|------------------|-----------------------|-----------------|---|---|---|---------------------------------------------------------------------------|---|--------|
| S126 | Laying hens                        | 19/02/2018 | Rectal           | Bejaia (Melbou)       | PNG1            | - | - | + | <i>clfB, fib, etb, sea, sei, seg, hla, hld, hlg, hlg2</i>                 | 1 | ST6    |
| S127 | Laying hens                        | 28/04/2018 | Oral             | Bejaia (Ighil Ali)    | PNG1            | - | - | + | <i>clfB, fib, etb, sea, sei, seg, hla, hld, hlg, hlg2</i>                 | 1 | ST5    |
| S136 | Laying hens                        | 18/04/2018 | Oral             | Bejaia (Amizour)      | PNG1            | - | - | + | <i>fnbA, clfB, fib, etb, sea, sei, seg, hla, hld, hlg, hlg2</i>           | 1 | ST6    |
| S139 | Laying hens                        | 28/04/2018 | Oral             | Bejaia (Ighil Ali)    | PNG1            | - | - | + | <i>clfB, fib, etb, sei, seg, hla, hld, hlg, hlg2</i>                      | 2 | ST15   |
| S140 | Laying hens                        | 28/04/2018 | Oral             | Bejaia (Beni Maouche) | PNG1            | - | - | + | <i>clfB, fib, etb, sea, sei, seg, hla, hld, hlg, hlg2</i>                 | 1 | ST5    |
| S143 | Laying hens                        | 28/04/2018 | Rectal           | Bejaia (Beni Maouche) | -               | - | - | + | <i>clfB, fib, etb, sea, seg, hla, hld, hlg</i>                            | 1 | ST194  |
| S144 | Laying hens                        | 28/04/2018 | Oral             | Bejaia (Ighil Ali)    | -               | - | - | + | <i>clfB, fib, etb, sea, sei, seg, hla, hld, hlg, hlg2</i>                 | 1 | ST5    |
| S146 | Laying hens                        | 02/03/2018 | Rectal           | Algiers (Baraki)      | -               | - | - | + | <i>fnbA, clfB, fib, etb, sea, sek, sei, seg, seq, hla, hld, hlg, hlg2</i> | 1 | ST97   |
| S147 | Laying hens                        | 18/04/2018 | Oral             | Bejaia (Amizour)      | -               | - | - | + | <i>clfB, fib, etb, sea, sei, seg, hla, hld, hlg, hlg2</i>                 | 1 | ST291  |
| S149 | Laying hens                        | 18/04/2018 | Oral             | Bejaia (Amizour)      | -               | - | - | + | <i>clfB, fib, etb, sea, sei, seg, hla, hld, hlg, hlg2</i>                 | 1 | ST15   |
| S150 | Laying hens                        | 26/04/2018 | Oral             | Bejaia (Akbou)        | PNG1            | - | - | + | <i>clfB, fib, eta, sei, seg, hla, hld, hlg, hlg2</i>                      | 2 | ST15   |
| S161 | Broilers                           | 18/02/2018 | Rectal           | Bejaia (El Kseur)     | ERY, iMLSb      | - | - | + | <i>clfB, fib, etb, sei, seg, hla, hld, hlg, hlg2</i>                      | 4 | ST121  |
| S226 | Dog owner                          | 25/04/2018 | Nasal            | Bejaia                | PNG1            | - | - | + | <i>fnbA, clfB, fib, etb, sea, sei, seg, hla, hld, hlg, hlg2</i>           | 1 | ST199  |
| S245 | Human (Community)                  | 11/07/2018 | Nasal            | Bouira                | PNG1-KMN        | - | - | + | <i>fnbB, clfB, fib, eta, sei, hla, hld, hlg, hlg2</i>                     | 2 | ST151  |
| S268 | Human (Community)                  | 17/02/2018 | Nasal            | Bousaada              | PNG1            | - | - | + | <i>fnbA, clfB, fib, eta, sec, sei, seg, hla, hld, hlg, hlg2</i>           | 3 | ST4685 |
| S289 | Table egg                          | 02/03/2018 | Surface swabbing | Algiers (Baraki)      | -               | - | - | + | <i>clfB, fib, etb, sea, sei, seg, hla, hld, hlg, hlg2</i>                 | 1 | ST7    |
| S1   | Wild bird ( <i>Columba livia</i> ) | 04/03/2018 | Feces            | Bejaia                | PNG1            | - | - | - | <i>clfB, fib, sec, sei, seg, hld, hlg2</i>                                | 1 | NT     |
| S2   | Wild bird ( <i>Columba livia</i> ) | 29/05/2018 | Feces            | Setif                 | RIF             | - | - | - | <i>clfB, fib, sea, sei, hla, hld, hlg, hlg2</i>                           | 1 | NT     |
| S3   | Wild bird ( <i>Columba livia</i> ) | 29/05/2018 | Feces            | Setif                 | PNG1-ERY, iMLSb | - | - | - | <i>fnbB, clfB, fib, sea, sei, hla, hld, hlg, hlg2</i>                     | 1 | NT     |
| S4   | Wild bird ( <i>Columba livia</i> ) | 18/04/2018 | Feces            | Bejaia                | PNG1            | - | - | - | <i>clfB, fib, sec, sei, seg, hld, hlg2</i>                                | 1 | NT     |

|     |                                          |            |           |                   |          |   |   |   |                                                                 |   |    |
|-----|------------------------------------------|------------|-----------|-------------------|----------|---|---|---|-----------------------------------------------------------------|---|----|
| S5  | Wild bird ( <i>Columba livia</i> )       | 04/03/2018 | Feces     | Bejaia            | PNG1     | - | - | - | <i>fnbB, clfB, fib, sea, sec, sei, seg, hla, hld, hlg, hlg2</i> | 1 | NT |
| S6  | Wild bird ( <i>Columba livia</i> )       | 04/03/2018 | Feces     | Bejaia            | PNG1     | - | - | - | <i>fnbB, clfB, fib, sei, hla, hld, hlg, hlg2</i>                | 2 | NT |
| S7  | Wild bird ( <i>Columba livia</i> )       | 22/04/2018 | Feces     | Bejaia            | PNG1-RIF | - | - | - | <i>clfB, cna, sea, sei, hla, hld, hlg, hlg2</i>                 | 2 | NT |
| S8  | Wild bird ( <i>Columba livia</i> )       | 18/04/2018 | Feces     | Bejaia            | PNG1     | - | - | - | <i>clfB, cna, sea, sei, hla, hld, hlg, hlg2</i>                 | 2 | NT |
| S9  | Wild bird ( <i>Columba livia</i> )       | 24/04/2018 | Feces     | Bejaia            | -        | - | - | - | <i>clfB, cna, sea, sei, hla, hld, hlg, hlg2</i>                 | 2 | NT |
| S10 | Wild bird ( <i>Columba livia</i> )       | 18/04/2018 | Feces     | Bejaia            | PNG1     | - | - | - | <i>clfB, fib, sea, sei, hla, hld, hlg, hlg2</i>                 | 1 | NT |
| S11 | Wild bird ( <i>Columba livia</i> )       | 30/06/2018 | Feces     | Mila              | -        | - | - | - | <i>clfB, fib, sea, sei, hla, hld, hlg, hlg2</i>                 | 1 | NT |
| S12 | Wild bird ( <i>Columba livia</i> )       | 24/05/2018 | Feces     | Jijel             | PNG1     | - | - | - | <i>clfB, fib, sea, sei, hla, hld, hlg, hlg2</i>                 | 1 | NT |
| S13 | Wild bird ( <i>Columba livia</i> )       | 24/05/2018 | Feces     | Jijel             | PNG1     | - | - | - | <i>clfB, fib, sea, sei, hla, hld, hlg, hlg2</i>                 | 1 | NT |
| S14 | Wild bird ( <i>Columba livia</i> )       | 30/06/2018 | Feces     | Mila              | -        | - | - | - | <i>clfB, fib, sea, sei, hla, hld, hlg, hlg2</i>                 | 1 | NT |
| S15 | Wild bird ( <i>Anas platyrhynchos</i> )  | 14/01/2018 | Feces     | Jijel             | -        | - | - | - | <i>clfB, fib, hla, hlb, hld, hlg</i>                            | 1 | NT |
| S16 | Boar                                     | 07/05/2018 | Nasal     | Bejaia (Toudja)   | -        | - | - | - | <i>clfB, fib, sea, sei, hla, hlb, hld, hlg, hlg2</i>            | 1 | NT |
| S17 | Boar                                     | 03/03/2018 | Nasal     | Bejaia (Barbacha) | PNG1     | - | - | - | <i>clfB, fib, sea, sei, hla, hld, hlg, hlg2</i>                 | 1 | NT |
| S18 | Boar                                     | 03/03/2018 | Nasal     | Bejaia (Barbacha) | -        | - | - | - | <i>clfB, cna, sea, sei, hla, hld, hlg, hlg2</i>                 | 1 | NT |
| S19 | Boar                                     | 07/05/2018 | Nasal     | Bejaia (Toudja)   | PNG1     | - | - | - | <i>clfB, cna, sea, sei, hla, hld, hlg, hlg2</i>                 | 1 | NT |
| S20 | Boar                                     | 10/02/2018 | Nasal     | Bejaia (Ikoubab)  | -        | - | - | - | <i>clfB, fib, sei, hla, hlb, hld, hlg, hlg2</i>                 | 2 | NT |
| S21 | Wild fish ( <i>Sardina pilchardus</i> )  | 30/04/2018 | Intestine | Bejaia            | PNG1     | - | - | - | <i>clfB, fib, sei, hla, hld, hlg, hlg2</i>                      | 1 | NT |
| S22 | Wild fish ( <i>Sardina pilchardus</i> )  | 14/03/2018 | Intestine | Jijel             | PNG1     | - | - | - | <i>clfB, fib, sea, sec, seq, seh, hla, hld, hlg, hlg2</i>       | 3 | NT |
| S23 | Wild fish ( <i>Trachurus trachurus</i> ) | 14/03/2018 | Intestine | Jijel             | PNG1     | - | - | - | <i>fnbB, clfB, fib, sei, hla, hld, hlg, hlg2</i>                | 2 | NT |
| S24 | Wild fish ( <i>Mullus surmuletus</i> )   | 03/01/2018 | Intestine | Bejaia            | PNG1     | - | - | - | <i>clfB, fib, sea, sek, seq, seh, hla, hld, hlg, hlg2</i>       | 3 | NT |



|     |                                           |            |           |                                    |          |   |   |   |                                                                        |   |    |
|-----|-------------------------------------------|------------|-----------|------------------------------------|----------|---|---|---|------------------------------------------------------------------------|---|----|
| S25 | Wild fish ( <i>Sarpa sarpa</i> )          | 25/04/2018 | Intestine | Jijel                              | -        | - | - | - | <i>clfB, fib, sei, hla, hlb, hld, hlg, hlg2</i>                        | 1 | NT |
| S26 | Wild fish ( <i>Merlangius merlangus</i> ) | 03/01/2018 | Intestine | Bejaia                             | PNG1-FAD | - | - | - | <i>clfB, fib, sea, sek, seq, seh, hla, hld, hlg, hlg2</i>              | 3 | NT |
| S27 | Wild fish ( <i>Pagellus bogaraveo</i> )   | 11/07/2018 | Intestine | Tizi Ouzou                         | PNG1-FAD | - | - | - | <i>clfB, fib, sea, sec, seq, seh, hla, hld, hlg, hlg2</i>              | 3 | NT |
| S28 | Monkey ( <i>Macaca sylvanus</i> )         | 25/04/2018 | Feces     | Bejaia (Gouraya)                   | PNG1     | - | - | - | <i>clfB, fib, sea, sei, hla, hld, hlg, hlg2</i>                        | 1 | NT |
| S29 | Porcupine ( <i>Hystrix cristata</i> )     | 20/04/2018 | Nasal     | Bejaia (Barbacha)                  | -        | - | - | - | <i>clfB, fib, sei, hla, hlb, hld, hlg, hlg2</i>                        | 2 | NT |
| S32 | Bovine ( <i>Bos taurus</i> )              | 17/02/2018 | Nasal     | Bousaada                           | -        | - | - | - | <i>fnbB, clfB, fib, hla, hlb, hld, hlg, hlg2</i>                       | 1 | NT |
| S33 | Bovine ( <i>Bos taurus</i> )              | 30/06/2018 | Nasal     | Mila                               | PNG1-KMN | - | - | - | <i>fnbB, clfB, fib, seb, sei, hla, hld, hlg, hlg2</i>                  | 1 | NT |
| S34 | Bovine ( <i>Bos taurus</i> )              | 06/02/2018 | Nasal     | Constantine                        | PNG1     | - | - | - | <i>fnbB, clfB, fib, seb, sei, seg, edinB, hla, hlb, hld, hlg, hlg2</i> | 1 | NT |
| S35 | Bovine ( <i>Bos taurus</i> )              | 22/04/2018 | Nasal     | Bourdj Bou Arreridj (Zemoura)      | PNG1     | - | - | - | <i>clfB, fib, sea, sei, hla, hld, hlg, hlg2</i>                        | 1 | NT |
| S36 | Bovine ( <i>Bos taurus</i> )              | 22/04/2018 | Nasal     | Bourdj Bou Arreridj (Ouled Bounem) | PNG1     | - | - | - | <i>fnbB, clfB, fib, sea, sei, hla, hld, hlg, hlg2</i>                  | 1 | NT |
| S37 | Bovine ( <i>Bos taurus</i> )              | 22/04/2018 | Nasal     | Bourdj Bou Arreridj (Zemoura)      | -        | - | - | - | <i>clfB, fib, hla, hlb, hld, hlg2</i>                                  | 1 | NT |
| S39 | Bovine ( <i>Bos taurus</i> )              | 13/02/2018 | Nasal     | Bejaia (Oued Ghir)                 | PNG1     | - | - | - | <i>clfB, fib, sei, seg, hla, hld, hlg, hlg2</i>                        | 2 | NT |
| S40 | Bovine ( <i>Bos taurus</i> )              | 06/02/2018 | Nasal     | Bejaia (Boukhelifa)                | -        | - | - | - | <i>fnbB, clfB, fib, seb, sei, hla, hld, hlg, hlg2</i>                  | 1 | NT |
| S41 | Bovine ( <i>Bos taurus</i> )              | 13/02/2018 | Nasal     | Bejaia (Beni Maouche)              | -        | - | - | - | <i>fnbB, clfB, fib, sei, hla, hlb, hld, hlg, hlg2</i>                  | 1 | NT |
| S42 | Bovine ( <i>Bos taurus</i> )              | 22/04/2018 | Nasal     | Bourdj Bou Arreridj (Khelil)       | PNG1     | - | - | - | <i>clfB, fib, sea, sei, hla, hld, hlg, hlg2</i>                        | 1 | NT |
| S43 | Bovine ( <i>Bos taurus</i> )              | 22/04/2018 | Nasal     | Bourdj Bou Arreridj (Khelil)       | PNG1     | - | - | - | <i>clfB, cna, sea, sei, hla, hld, hlg, hlg2</i>                        | 1 | NT |
| S44 | Bovine ( <i>Bos taurus</i> )              | 22/04/2018 | Nasal     | Bourdj Bou Arreridj (Khelil)       | PNG1     | - | - | - | <i>fnbB, clfB, fib, sea, sei, hla, hld, hlg, hlg2</i>                  | 1 | NT |
| S45 | Bovine ( <i>Bos taurus</i> )              | 22/04/2018 | Nasal     | Bourdj Bou Arreridj (Zemoura)      | PNG1     | - | - | - | <i>fnbB, clfB, fib, sea, sei, hla, hld, hlg, hlg2</i>                  | 1 | NT |
| S48 | Ovine ( <i>Ovis aries</i> )               | 06/02/2018 | Nasal     | Bejaia (Boukhelifa)                | -        | - | - | - | <i>fnbB, clfB, fib, sei, seg, hla, hld, hlg, hlg2</i>                  | 1 | NT |
| S49 | Ovine ( <i>Ovis aries</i> )               | 12/02/2018 | Nasal     | Bejaia (Ighezar Amokrane)          | -        | - | - | - | <i>fnbB, clfB, fib, seb, sei, hla, hld, hlg, hlg2</i>                  | 1 | NT |

|     |                                       |            |       |                               |                 |   |   |   |                                                                             |   |    |
|-----|---------------------------------------|------------|-------|-------------------------------|-----------------|---|---|---|-----------------------------------------------------------------------------|---|----|
| S50 | Ovine ( <i>Ovis aries</i> )           | 30/06/2018 | Nasal | Mila                          | -               | - | - | - | <i>fnbB, clfB, cna, sei, seg, hla, hlb, hld, hlg, hlg2</i>                  | 1 | NT |
| S52 | Ovine ( <i>Ovis aries</i> )           | 06/02/2018 | Nasal | Bejaia (Boukhelifa)           | PNG1-KMN        | - | - | - | <i>fnbB, clfB, fib, sei, hla, hld, hlg, hlg2</i>                            | 1 | NT |
| S53 | Ovine ( <i>Ovis aries</i> )           | 11/07/2018 | Nasal | Bouira                        | PNG1            | - | - | - | <i>fnbB, clfB, fib, sea, sei, edinB, hla, hld, hlg, hlg2</i>                | 1 | NT |
| S55 | Ovine ( <i>Ovis aries</i> )           | 01/02/2018 | Nasal | Setif                         | PNG1            | - | - | - | <i>fnbB, clfB, fib, sei, seg, hla, hld, hlg, hlg2</i>                       | 2 | NT |
| S58 | Ovine ( <i>Ovis aries</i> )           | 22/04/2018 | Nasal | Bourdj Bou Arreridj (Zemoura) | PNG1            | - | - | - | <i>clfB, fib, sea, sei, hla, hld, hlg, hld2</i>                             | 1 | NT |
| S59 | Ovine ( <i>Ovis aries</i> )           | 22/04/2018 | Nasal | Bourdj Bou Arreridj (Zemoura) | PNG1            | - | - | - | <i>clfB, fib, sea, sei, hla, hld, hlg</i>                                   | 1 | NT |
| S61 | Ovine ( <i>Ovis aries</i> )           | 17/04/2018 | Nasal | Bejaia (Amizour)              | PNG1            | - | - | - | <i>fnbB, clfB, fib, sea, sei, hla, hld, hlg, hlg2</i>                       | 1 | NT |
| S64 | Ovine ( <i>Ovis aries</i> )           | 12/02/2018 | Nasal | Bejaia (Akbou)                | -               | - | - | - | <i>fnbB, clfB, fib, sec, sei, seg, seh, edinB, hla, hlb, hld, hlg, hlg2</i> | 1 | NT |
| S66 | Ovine ( <i>Ovis aries</i> )           | 01/02/2018 | Nasal | Setif                         | PNG1            | - | - | - | <i>clfB, fib, seb, sei, hla, hld, hlg, hlg2</i>                             | 1 | NT |
| S67 | Ovine ( <i>Ovis aries</i> )           | 17/02/2018 | Nasal | Bousaada                      | -               | - | - | - | <i>fnbB, clfB, cna, sea, sei, hla, hld, hlg, hlg2</i>                       | 1 | NT |
| S68 | Ovine ( <i>Ovis aries</i> )           | 17/02/2018 | Nasal | Bousaada                      | -               | - | - | - | <i>clfB, fib, sei, hla, hlb, hld, hlg, hlg2</i>                             | 1 | NT |
| S69 | Ovine ( <i>Ovis aries</i> )           | 24/05/2018 | Nasal | Jijel                         | PNG1-KMN        | - | - | - | <i>fnbB, clfB, fib, seb, sei, hla, hld, hlg, hlg2</i>                       | 1 | NT |
| S70 | Ovine ( <i>Ovis aries</i> )           | 24/05/2018 | Nasal | Jijel                         | PNG1-KMN        | - | - | - | <i>fnbB, clfB, fib, seb, sei, hla, hld, hlg, hlg2</i>                       | 1 | NT |
| S71 | Ovine ( <i>Ovis aries</i> )           | 01/02/2018 | Nasal | Setif                         | PNG1-ERY, iMLSb | - | - | - | <i>fnbB, clfB, fib, sei, hld, hlg, hlg2</i>                                 | 1 | NT |
| S72 | Ovine ( <i>Ovis aries</i> )           | 02/05/2018 | Nasal | Tizi Ouzou                    | PNG1            | - | - | - | <i>fnbB, clfB, fib, sei, hla, hlb, hld, hlg, hlg2</i>                       | 1 | NT |
| S81 | Goat ( <i>Capra hircus</i> )          | 22/05/2018 | Nasal | Bourdj Bou Arreridj (Khelil)  | PNG1            | - | - | - | <i>clfB, cna, sea, sei, seh, hla, hld, hlg, hlg2</i>                        | 1 | NT |
| S82 | Goat ( <i>Capra hircus</i> )          | 22/05/2018 | Nasal | Bourdj Bou Arreridj (Khelil)  | -               | - | - | - | <i>clfB, fib, sei, seh, hla, hlb, hld, hlg, hlg2</i>                        | 3 | NT |
| S83 | Goat ( <i>Capra hircus</i> )          | 06/02/2018 | Nasal | Bejaia (Boukhelifa)           | -               | - | - | - | <i>fnbA, clfB, fib, sea, sec, sei, seg, edinB, hla, hlb, hld, hlg, hlg2</i> | 1 | NT |
| S84 | Goat ( <i>Capra hircus</i> )          | 02/05/2018 | Nasal | Tizi Ouzou                    | -               | - | - | - | <i>fnbB, clfB, fib, sec, seh, edinB, hla, hlb, hld, hlg, hlg2</i>           | 1 | NT |
| S85 | Goat ( <i>Capra aegagrus hircus</i> ) | 22/04/2018 | Nasal | Bourdj Bou Arreridj (Zemoura) | PNG1            | - | - | - | <i>fnbB, clfB, fib, sei, hla, hld, hlg, hlg2</i>                            | 2 | NT |
| S86 | Goat ( <i>Capra aegagrus hircus</i> ) | 22/04/2018 | Nasal | Bourdj Bou Arreridj (Zemoura) | PNG1            | - | - | - | <i>fnbB, clfB, fib, sei, hla, hld, hlg, hlg2</i>                            | 2 | NT |

|      |                                       |            |        |                              |          |   |   |   |                                                                                |   |    |
|------|---------------------------------------|------------|--------|------------------------------|----------|---|---|---|--------------------------------------------------------------------------------|---|----|
| S87  | Goat ( <i>Capra aegagrus hircus</i> ) | 02/05/2018 | Nasal  | Tizi Ouzou                   | PNG1     | - | - | - | <i>clfB, fib, sea, sei, hla, hld, hlg, hlg2</i>                                | 1 | NT |
| S89  | Rabbit                                | 18/04/2018 | Nasal  | Bejaia (Amizour)             | -        | - | - | - | <i>fnbB, clfB, fib, sei, hla, hld, hlg, hlg2</i>                               | 2 | NT |
| S90  | Rabbit                                | 18/04/2018 | Nasal  | Bejaia (Amizour)             | -        | - | - | - | <i>clfB, fib, sea, sei, hla, hld, hlg, hlg2</i>                                | 1 | NT |
| S91  | Rabbit                                | 18/04/2018 | Nasal  | Bejaia (Amizour)             | -        | - | - | - | <i>clfB, cna, sei, hla, hlb, hld, hlg, hlg2</i>                                | 1 | NT |
| S93  | Rabbit                                | 09/02/2018 | Nasal  | Bejaia (Ouzellaguen)         | PNG1     | - | - | - | <i>fnbB, clfB, fib, sei, hla, hld, hlg, hlg2</i>                               | 2 | NT |
| S96  | Rabbit                                | 25/04/2018 | Nasal  | Bejaia (Barbacha)            | -        | - | - | - | <i>fnbB, clfB, fib, sec, sei, seg, seh, hla, hlb, hld, hlg, hlg2</i>           | 3 | NT |
| S97  | Rabbit                                | 18/04/2018 | Nasal  | Bejaia (Amizour)             | -        | - | - | - | <i>fnbB, clfB, fib, sei, seh, hla, hlb, hld, hlg, hlg2</i>                     | 1 | NT |
| S98  | Rabbit                                | 18/04/2018 | Nasal  | Bejaia (Amizour)             | -        | - | - | - | <i>fnbB, clfB, fib, sei, seh, edinB, hla, hlb, hld, hlg, hlg2</i>              | 3 | NT |
| S99  | Rabbit                                | 18/04/2018 | Nasal  | Bejaia (Amizour)             | -        | - | - | - | <i>fnbB, clfB, fib, hla, hlb, hld, hlg2</i>                                    | 1 | NT |
| S100 | Rabbit                                | 04/05/2018 | Nasal  | Bejaia (Kherrata)            | PNG1     | - | - | - | <i>clfB, fib, sec, sei, seg, hld, hlg2</i>                                     | 1 | NT |
| S101 | Laying hens                           | 02/03/2018 | Oral   | Algiers (Baraki)             | PNG1     | - | - | - | <i>clfB, fib, sea, sei, hla, hld, hlg, hlg2</i>                                | 1 | NT |
| S103 | Laying hens                           | 26/04/2018 | Oral   | Bejaia (Akbou)               | -        | - | - | - | <i>fnbB, clfB, fib, sea, sec, sek, sei, seg, seq, seh, hla, hld, hlg, hlg2</i> | 1 | NT |
| S105 | Laying hens                           | 28/04/2018 | Oral   | Bejaia (Beni Maouche)        | PNG1     | - | - | - | <i>clfB, fib, sea, sei, hla, hld, hlg, hlg2</i>                                | 1 | NT |
| S106 | Laying hens                           | 04/05/2018 | Rectal | Bejaia (Kherrata)            | PNG1     | - | - | - | <i>clfB, fib, sec, sei, seg, hld, hlg2</i>                                     | 1 | NT |
| S110 | Laying hens                           | 16/04/2018 | Rectal | Bejaia (Timezrit)            | PNG1     | - | - | - | <i>clfB, fib, sea, sei, hla, hld, hlg, hlg2</i>                                | 1 | NT |
| S112 | Laying hens                           | 17/02/2018 | Oral   | Bousaada                     | PNG1     | - | - | - | <i>clfB, fib, sea, sei, hla, hld, hlg, hlg2</i>                                | 1 | NT |
| S113 | Laying hens                           | 02/03/2018 | Rectal | Algiers (Baraki)             | PNG1     | - | - | - | <i>fnbA, clfB, fib, hla, hld, hlg, hlg2</i>                                    | 3 | NT |
| S114 | Laying hens                           | 28/04/2018 | Oral   | Bejaia (Beni Maouche)        | PNG1     | - | - | - | <i>clfB, fib, sea, sei, hla, hld, hlg, hlg2</i>                                | 1 | NT |
| S116 | Laying hens                           | 22/04/2018 | Oral   | Bourdj Bou Arreridj (Khelil) | -        | - | - | - | <i>fnbA, clfB, fib, sea, sei, edinB, hla, hld, hlg, hlg2</i>                   | 1 | NT |
| S118 | Laying hens                           | 21/04/2018 | Oral   | Bejaia (Beni Ksila)          | PNG1-KMN | - | - | - | <i>fnbB, clfB, fib, seb, sei, hla, hld, hlg, hlg2</i>                          | 1 | NT |
| S119 | Laying hens                           | 18/04/2018 | Oral   | Bejaia (Amizour)             | PNG1     | - | - | - | <i>clfB, fib, sea, sei, hla, hld, hlg, hlg2</i>                                | 1 | NT |
| S120 | Laying hens                           | 16/04/2018 | Rectal | Bejaia (Timezrit)            | PNG1     | - | - | - | <i>clfB, fib, sea, sei, seg, hla, hld, hlg, hlg2</i>                           | 1 | NT |

|      |             |            |        |                     |                 |   |   |   |                                                              |   |    |
|------|-------------|------------|--------|---------------------|-----------------|---|---|---|--------------------------------------------------------------|---|----|
| S121 | Laying hens | 02/03/2018 | Rectal | Algiers (Baraki)    | PNG1            | - | - | - | <i>clfB, fib, sea, sei, seg, hla, hld, hlg, hlg2</i>         | 1 | NT |
| S123 | Laying hens | 28/04/2018 | Oral   | Bejaia (Ighil Ali)  | PNG1            | - | - | - | <i>clfB, fib, sea, sei, seg, hla, hld, hlg, hlg2</i>         | 1 | NT |
| S128 | Laying hens | 16/04/2018 | Oral   | Bejaia (Timezrit)   | PNG1            | - | - | - | <i>clfB, fib, sea, sei, hla, hld, hlg, hlg2</i>              | 1 | NT |
| S129 | Laying hens | 26/04/2018 | Oral   | Bejaia (Akbou)      | PNG1            | - | - | - | <i>clfB, fib, sea, sei, hla, hld, hlg, hlg2</i>              | 1 | NT |
| S130 | Laying hens | 26/04/2018 | Rectal | Bejaia (Akbou)      | PNG1            | - | - | - | <i>fnbA, clfB, fib, sea, sei, edinB, hla, hld, hlg, hlg2</i> | 1 | NT |
| S131 | Laying hens | 18/04/2018 | Rectal | Bejaia (Amizour)    | PNG1            | - | - | - | <i>clfB, fib, sea, sek, seq, hla, hld, hlg, hlg2</i>         | 1 | NT |
| S132 | Laying hens | 19/02/2018 | Oral   | Bejaia (Melbou)     | PNG1            | - | - | - | <i>clfB, fib, sea, sei, hla, hld, hlg, hlg2</i>              | 1 | NT |
| S133 | Laying hens | 18/04/2018 | Rectal | Bejaia (Amizour)    | PNG1            | - | - | - | <i>fnbA, clfB, fib, sea, sek, seq, hla, hld, hlg, hlg2</i>   | 1 | NT |
| S134 | Laying hens | 16/04/2018 | Rectal | Bejaia (Timezrit)   | PNG1            | - | - | - | <i>clfB, fib, sea, sek, sek, hla, hld, hlg, hlg2</i>         | 1 | NT |
| S137 | Laying hens | 26/04/2018 | Oral   | Bejaia (Akbou)      | PNG1            | - | - | - | <i>clfB, fib, sea, sek, seq, hla, hld, hlg, hlg2</i>         | 1 | NT |
| S141 | Laying hens | 02/03/2018 | Rectal | Algiers (Baraki)    | PNG1            | - | - | - | <i>fnbA, clfB, fib, sea, sek, seq, hla, hld, hlg, hlg2</i>   | 1 | NT |
| S142 | Laying hens | 19/02/2018 | Oral   | Bejaia (Melbou)     | -               | - | - | - | <i>clfB, fib, sea, sei, hla, hld, hlg, hlg2</i>              | 1 | NT |
| S148 | Laying hens | 19/02/2018 | Rectal | Bejaia (Melbou)     | -               | - | - | - | <i>fnbB, clfB, fib, sea, sei, hla, hld, hlg, hlg2</i>        | 1 | NT |
| S151 | Laying hens | 16/04/2018 | Rectal | Bejaia (Timezrit)   | PNG1            | - | - | - | <i>clfB, fib, sea, sei, hla, hld, hlg, hlg2</i>              | 1 | NT |
| S153 | Laying hens | 19/05/2018 | Oral   | Batna               | -               | - | - | - | <i>clfB, fib, sea, sei, hla, hld, hlg, hlg2</i>              | 1 | NT |
| S154 | Laying hens | 26/04/2018 | Oral   | Bejaia (Akbou)      | PNG1            | - | - | - | <i>clfB, fib, sea, sei, hla, hld, hlg, hlg2</i>              | 1 | NT |
| S159 | Broilers    | 18/02/2018 | Oral   | Bejaia (El Kseur)   | ERY-MNO, iMLSb  | - | - | - | <i>clfB, fib, sei, seg, hla, hlb, hld, hlg, hlg2</i>         | 2 | NT |
| S160 | Broilers    | 19/05/2018 | Rectal | Batna               | PNG1-ERY, iMLSb | - | - | - | <i>clfB, fib, sea, sei, seg, hla, hlb, hld, hlg, hlg2</i>    | 2 | NT |
| S162 | Turkey      | 25/04/2018 | Oral   | Bejaia (Timezrit)   | PNG1            | - | - | - | <i>clfB, fib, sea, sei, hla, hld, hlg, hlg2</i>              | 1 | NT |
| S163 | Turkey      | 19/02/2018 | Rectal | Algiers (Salembier) | PNG1-ERY, iMLSb | - | - | - | <i>clfB, fib, sei, hla, hlb, hld, hlg, hlg2</i>              | 1 | NT |

|      |        |            |        |                     |                 |   |   |   |                                                                      |   |    |
|------|--------|------------|--------|---------------------|-----------------|---|---|---|----------------------------------------------------------------------|---|----|
| S164 | Turkey | 19/02/2018 | Oral   | Algiers (Salembier) | PNG1            | - | - | - | <i>clfB, fib, seb, sei, hla, hld, hlg, hlg2</i>                      | 1 | NT |
| S165 | Turkey | 19/02/2018 | Rectal | Algiers (Salembier) | -               | - | - | - | <i>fnbB, clfB, fib, sea, seb, sek, seq, hla, hlb, hld, hlg, hlg2</i> | 1 | NT |
| S166 | Turkey | 19/02/2018 | Oral   | Algiers (Salembier) | -               | - | - | - | <i>fnbB, clfB, fib, sea, sei, hla, hlb, hld, hlg, hlg2</i>           | 1 | NT |
| S167 | Cat    | 06/02/2018 | Nasal  | Bejaia              | PNG1-ERY, iMLSb | - | - | - | <i>clfB, fib, sei, hla, hlb, hld, hlg, hlg2</i>                      | 1 | NT |
| S168 | Cat    | 21/04/2018 | Nasal  | Bejaia (Amizour)    | PNG1            | - | - | - | <i>clfB, fib, sea, sei, hla, hlb, hld, hlg, hlg2</i>                 | 1 | NT |
| S169 | Cat    | 20/04/2018 | Nasal  | Bejaia (El Kseur)   | PNG1            | - | - | - | <i>clfB, fib, sea, sei, hla, hld, hlg, hlg2</i>                      | 1 | NT |
| S170 | Cat    | 19/05/2018 | Nasal  | Batna               | -               | - | - | - | <i>fnbB, clfB, fib, sea, sei, hla, hld, hlg, hlg2</i>                | 1 | NT |
| S171 | Cat    | 04/03/2018 | Nasal  | Bejaia (Sidi Aich)  | -               | - | - | - | <i>fnbB, clfB, fib, sea, sei, hla, hlb, hld, hlg, hlg2</i>           | 3 | NT |
| S172 | Cat    | 04/03/2018 | Nasal  | Bejaia (Sidi Aich)  | -               | - | - | - | <i>fnbA, clfB, fib, sea, sei, seg, seh, hla, hlb, hld, hlg, hlg2</i> | 1 | NT |
| S174 | Cat    | 10/05/2018 | Nasal  | Boumerdes           | PNG1            | - | - | - | <i>clfB, fib, sea, sei, hla, hld, hlg, hlg2</i>                      | 1 | NT |
| S175 | Cat    | 21/04/2018 | Nasal  | Bejaia (El Kseur)   | PNG1            | - | - | - | <i>clfB, fib, sea, sek, sei, seg, seq, sed, hla, hld, hlg, hlg2</i>  | 1 | NT |
| S176 | Cat    | 04/03/2018 | Nasal  | Bejaia (Sidi Aich)  | PNG1            | - | - | - | <i>fnbA, clfB, fib, hla, hld, hlg, hlg2</i>                          | 3 | NT |
| S177 | Cat    | 19/05/2018 | Nasal  | Batna               | -               | - | - | - | <i>clfB, fib, sea, sei, hla, hld, hlg, hlg2</i>                      | 3 | NT |
| S178 | Cat    | 19/05/2018 | Nasal  | Batna               | -               | - | - | - | <i>clfB, fib, sei, hla, hlb, hld, hlg, hlg2</i>                      | 1 | NT |
| S179 | Cat    | 20/04/2018 | Nasal  | Bejaia (El Kseur)   | -               | - | - | - | <i>clfB, fib, sea, sei, hla, hld, hlg, hlg2</i>                      | 1 | NT |
| S180 | Cat    | 21/02/2018 | Nasal  | Bejaia              | PNG1            | - | - | - | <i>clfB, fib, seb, sei, hla, hld, hlg, hlg2</i>                      | 1 | NT |
| S182 | Dog    | 24/04/2018 | Nasal  | Bejaia (El Kseur)   | PNG1            | - | - | - | <i>clfB, fib, sea, sei, hla, hld, hlg, hlg2</i>                      | 1 | NT |
| S183 | Dog    | 19/05/2018 | Nasal  | Batna               | PNG1            | - | - | - | <i>clfB, fib, sei, hla, hlb, hld, hlg, hlg2</i>                      | 1 | NT |
| S184 | Dog    | 19/05/2018 | Nasal  | Batna               | PNG1            | - | - | - | <i>fnbB, clfB, fib, sei, hla, hld, hlg, hlg2</i>                     | 2 | NT |
| S185 | Dog    | 25/04/2018 | Nasal  | Bejaia              | PNG1            | - | - | - | <i>fnbB, clfB, fib, sea, sei, hla, hlb, hld, hlg, hlg2</i>           | 1 | NT |
| S186 | Dog    | 16/02/2018 | Nasal  | Algiers (Rouiba)    | PNG1            | - | - | - | <i>fnbB, clfB, fib, sei, hla, hld, hlg, hlg2</i>                     | 2 | NT |

|      |             |            |       |                              |                 |   |   |   |                                                                 |   |    |
|------|-------------|------------|-------|------------------------------|-----------------|---|---|---|-----------------------------------------------------------------|---|----|
| S188 | Dog         | 17/04/2018 | Nasal | Bejaia                       | PNG1            | - | - | - | <i>fnbB, clfB, fib, sea, sei, hla, hld, hlg, hlg2</i>           | 1 | NT |
| S189 | Dog         | 21/04/2018 | Nasal | Bejaia (Amizour)             | PNG1            | - | - | - | <i>fnbA, clfB, fib, sea, sek, hla, hld, hlg, hlg2</i>           | 1 | NT |
| S190 | Dog         | 10/05/2018 | Nasal | Boumerdes                    | PNG1            | - | - | - | <i>clfB, fib, sea, sei, hla, hld, hlg, hlg2</i>                 | 3 | NT |
| S191 | Dog         | 10/05/2018 | Nasal | Boumerdes                    | PNG1            | - | - | - | <i>clfB, fib, sec, sei, seg, hld, hlg2</i>                      | 1 | NT |
| S192 | Dog         | 05/03/2018 | Nasal | Bejaia                       | PNG1            | - | - | - | <i>fnbA, clfB, fib, sei, hla, hlb, hld, hlg, hlg2</i>           | 2 | NT |
| S193 | Dog         | 21/04/2018 | Nasal | Bejaia (Amizour)             | -               | - | - | - | <i>clfB, fib, sea, sei, hla, hld, hlg, hlg2</i>                 | 1 | NT |
| S195 | Dog         | 05/05/2018 | Nasal | Mila                         | -               | - | - | - | <i>fnbA, clfB, fib, sea, sek, sei, sed, hla, hld, hlg, hlg2</i> | 1 | NT |
| S196 | Dog         | 17/04/2018 | Nasal | Bejaia                       | -               | - | - | - | <i>clfB, fib, sea, sei, hla, hld, hlg, hlg2</i>                 | 1 | NT |
| S197 | Dog         | 26/04/2018 | Nasal | Bejaia (Akbou)               | -               | - | - | - | <i>clfB, fib, sea, sei, hla, hld, hlg, hlg2</i>                 | 3 | NT |
| S198 | Dog         | 18/02/2018 | Nasal | Constantine                  | -               | - | - | - | <i>clfB, fib, sea, sei, hla, hld, hlg, hlg2</i>                 | 1 | NT |
| S199 | Dog         | 16/02/2018 | Nasal | Algiers (Rouiba)             | PNG1            | - | - | - | <i>fnbB, clfB, fib, sei, hla, hld, hlg, hlg2</i>                | 1 | NT |
| S201 | Dog         | 16/02/2018 | Nasal | Algiers (Rouiba)             | PNG1            | - | - | - | <i>fnbB, clfB, fib, sei, hla, hld, hlg, hlg2</i>                | 2 | NT |
| S202 | Dog         | 06/05/2018 | Nasal | Bejaia (Barbacha)            | -               | - | - | - | <i>clfB, fib, sei, seg, hld, hlg2</i>                           | 1 | NT |
| S203 | Dog         | 01/05/2018 | Nasal | Tizi Ouzou                   | -               | - | - | - | <i>clfB, fib, sei, hla, hld, hlg, hlg2</i>                      | 1 | NT |
| S204 | Dog         | 05/05/2018 | Nasal | Mila                         | -               | - | - | - | <i>clfB, fib, sei, seg, hld, hlg2</i>                           | 1 | NT |
| S205 | Horse       | 18/02/2018 | Nasal | Constantine                  | PNG1            | - | - | - | <i>clfB, fib, sea, sek, seq, sed, hla, hld, hlg, hlg2</i>       | 3 | NT |
| S207 | Horse       | 05/05/2018 | Nasal | Bejaia (Adekar)              | -               | - | - | - | <i>fnbA, clfB, fib, sea, sec, sei, seh, hla, hlb, hld, hlg</i>  | 1 | NT |
| S208 | Horse       | 21/04/2018 | Nasal | Bourdj Bou Arreridj (Chiffa) | PNG1            | - | - | - | <i>clfB, fib, sea, sek, sed, hla, hlb, hld, hlg</i>             | 1 | NT |
| S210 | Horse       | 19/05/2018 | Nasal | Batna                        | PNG1            | - | - | - | <i>clfB, sei, seg, hla, hld, hlg2</i>                           | 1 | NT |
| S211 | Horse owner | 07/03/2018 | Nasal | Algiers (Kharouba)           | PNG1-ERY, iMLSb | - | - | - | <i>fnbB, clfB, fib, sei, hld, hlg2</i>                          | 1 | NT |
| S212 | Horse owner | 18/02/2018 | Nasal | Constantine                  | PNG1            | - | - | - | <i>clfB, fib, sei, hla, hlb, hld, hlg, hlg2</i>                 | 2 | NT |
| S219 | Cat owner   | 13/02/2018 | Nasal | Bejaia (Samaoune)            | -               | - | - | - | <i>clfB, fib, sea, sek, sei, seh, hla, hld, hlg, hlg2</i>       | 1 | NT |
| S221 | Dog owner   | 24/05/2018 | Nasal | Jijel                        | -               | - | - | - | <i>fnbB, clfB, fib, sea, sei, seg, seh, hla, hld, hlg, hlg2</i> | 1 | NT |
| S224 | Dog owner   | 18/02/2018 | Nasal | Constantine                  | PNG1            | - | - | - | <i>clfB, fib, sec, sei, seg, hld, hlg2</i>                      | 1 | NT |

|      |                   |            |       |                              |                  |   |   |   |                                                                     |   |    |
|------|-------------------|------------|-------|------------------------------|------------------|---|---|---|---------------------------------------------------------------------|---|----|
| S225 | Dog owner         | 18/02/2018 | Nasal | Constantine                  | PNG1             | - | - | - | <i>fnbA, clfB, fib, sei, hla, hld, hlg, hlg2</i>                    | 1 | NT |
| S227 | Dog owner         | 21/04/2018 | Nasal | Bejaia (Amizour)             | PNG1             | - | - | - | <i>fnbA, clfB, fib, sea, sei, hla, hld, hlg, hlg2</i>               | 1 | NT |
| S229 | Dog owner         | 21/04/2018 | Nasal | Bejaia (Amizour)             | -                | - | - | - | <i>fnbA, clfB, fib, sea, sei, hla, hld, hlg, hlg2</i>               | 3 | NT |
| S230 | Dog owner         | 15/04/2018 | Nasal | Bejaia                       | -                | - | - | - | <i>clfB, fib, sea, sei, hla, hld, hlg, hlg2</i>                     | 2 | NT |
| S231 | Dog owner         | 11/07/2018 | Nasal | Bouira                       | ERY, iMLSb       | - | - | - | <i>fnbB, clfB, fib, sei, hla, hld, hlg, hlg2</i>                    | 1 | NT |
| S234 | Farmer            | 24/05/2018 | Nasal | Jijel                        | PNG1             | - | - | - | <i>clfB, fib, sea, sei, hla, hld, hlg, hlg2</i>                     | 1 | NT |
| S235 | Farmer            | 22/04/2018 | Nasal | Bourdj Bou Arreridj (Khelil) | PNG1             | - | - | - | <i>fnbB, clfB, fib, sea, sei, edinB, hld, hlg, hlg2</i>             | 1 | NT |
| S236 | Farmer            | 26/02/2018 | Nasal | Bejaia (Akbou)               | PNG1-ERY-CMN-OFX | - | - | - | <i>clfB, fib, sea, sek, seq, hla, hld, hlg, hlg2</i>                | 1 | NT |
| S237 | Farmer            | 19/02/2018 | Nasal | Bejaia (Souk El Tenine)      | PNG1             | - | - | - | <i>fnbB, clfB, fib, sei, hla, hld, hlg, hlg2</i>                    | 3 | NT |
| S239 | Farmer            | 26/02/2018 | Nasal | Bejaia (Melbou)              | PNG1-ERY-OFX     | - | - | - | <i>clfB, fib, sea, sek, seq, hla, hld, hlg, hlg2</i>                | 1 | NT |
| S240 | Farmer            | 26/04/2018 | Nasal | Bejaia (Akbou)               | PNG1             | - | - | - | <i>clfB, fib, sea, sei, hla, hld, hlg, hlg2</i>                     | 1 | NT |
| S241 | Farmer            | 26/04/2018 | Nasal | Bejaia (Akbou)               | PNG1             | - | - | - | <i>clfB, fib, sei, seg, sed, hla, hlb, hld, hlg2</i>                | 3 | NT |
| S246 | Human (Community) | 02/05/2018 | Nasal | Bejaia (Sidi Aich)           | PNG1             | - | - | - | <i>clfB, fib, sec, sei, seg, hld, hlg</i>                           | 1 | NT |
| S250 | Human (Community) | 19/05/2018 | Nasal | Batna                        | PNG1-FAD         | - | - | - | <i>clfB, fib, sea, sek, sei, seg, sek, seh, hla, hld, hlg, hlg2</i> | 1 | NT |
| S251 | Human (Community) | 19/05/2018 | Nasal | Batna                        | PNG1             | - | - | - | <i>clfB, fib, sec, sei, seg, hla, hld, hlg, hlg2</i>                | 1 | NT |
| S252 | Human (Community) | 19/05/2018 | Nasal | Batna                        | PNG1             | - | - | - | <i>fnbA, clfB, fib, seb, sei, seg, hla, hlb, hld, hlg, hlg2</i>     | 2 | NT |
| S253 | Human (Community) | 02/05/2018 | Nasal | Tizi Ouzou                   | PNG1             | - | - | - | <i>clfB, fib, sei, seg, hla, hld, hlg2</i>                          | 1 | NT |
| S254 | Human (Community) | 06/02/2018 | Nasal | Constantine                  | -                | - | - | - | <i>fnbB, clfB, fib, sei, hla, hld, hlg, hlg2</i>                    | 1 | NT |
| S255 | Human (Community) | 02/03/2018 | Nasal | Algiers (Baraki)             | PNG1             | - | - | - | <i>fnbA, clfB, fib, sei, seg, edinB, hla, hld, hlg, hlg2</i>        | 2 | NT |
| S257 | Human (Community) | 11/07/2018 | Nasal | Bouira                       | PNG1             | - | - | - | <i>fnbB, clfB, fib, sei, hla, hld, hlg, hlg2</i>                    | 2 | NT |

|      |                             |            |                  |                           |                     |   |   |   |                                                            |   |    |
|------|-----------------------------|------------|------------------|---------------------------|---------------------|---|---|---|------------------------------------------------------------|---|----|
| S261 | Human<br>(Community)        | 11/07/2018 | Nasal            | Bouira                    | PNG1                | - | - | - | <i>clfB, sei, seg, hla, hlb, hld, hlg2</i>                 | 1 | NT |
| S266 | Human<br>(Community)        | 06/02/2018 | Nasal            | Constantine               | PNG1                | - | - | - | <i>fnbA, clfB, fib, sei, seg, hla, hld, hlg, hlg2</i>      | 1 | NT |
| S267 | Human<br>(Community)        | 17/02/2018 | Nasal            | Bousaada                  | PNG1                | - | - | - | <i>fnbA, clfB, fib, sei, hla, hld, hlg, hlg2</i>           | 3 | NT |
| S269 | Meat                        | 04/03/2018 |                  | Bejaia (Sidi Aich)        | PNG1                | - | - | - | <i>clfB, cna, sea, sei, hla, hld, hlg, hlg2</i>            | 1 | NT |
| S270 | Meat                        | 26/02/2018 |                  | Bejaia                    | -                   | - | - | - | <i>clfB, cna, sei, hla, hld, hlg, hlg2</i>                 | 1 | NT |
| S271 | Meat                        | 11/07/2018 |                  | Bouira                    | PNG1-ERY, iMLSb     | - | - | - | <i>fnbB, clfB, cna, sei, hla, hld, hlg, hlg2</i>           | 2 | NT |
| S272 | Meat                        | 04/03/2018 |                  | Bejaia (Akbou)            | -                   | - | - | - | <i>clfB, cna, sea, sei, hla, hlb, hld, hlg, hlg2</i>       | 1 | NT |
| S273 | Sausage                     | 04/03/2018 |                  | Bejaia (Ighezar Amokrane) | -                   | - | - | - | <i>clfB, fib, sea, sei, hla, hlb, hld, hlg, hlg2</i>       | 1 | NT |
| S274 | Chicken offal's             | 16/06/2018 |                  | Bejaia (Sidi Aich)        | PNG1-ERY, iMLSb     | - | - | - | <i>fnbB, clfB, fib, hla, hld, hlg, hlg2</i>                | 2 | NT |
| S275 | Chicken offal's             | 10/05/2018 |                  | Boumerdes                 | PNG1-ERY, iMLSb     | - | - | - | <i>fnbB, clfB, fib, sei, hla, hld, hlg, hlg2</i>           | 2 | NT |
| S276 | Cow milk                    | 16/02/2018 | Milk             | Bejaia (Amizour)          | PNG1-ERY, iMLSb     | - | - | - | <i>fnbB, clfB, fib, sei, hla, hld, hlg, hlg2</i>           | 2 | NT |
| S277 | Cow milk                    | 26/03/2018 | Milk             | Bouira                    | PNG1-ERY, iMLSb     | - | - | - | <i>fnbB, clfB, fib, sei, hla, hld, hlg, hlg2</i>           | 2 | NT |
| S278 | Cow milk                    | 01/04/2018 | Milk             | Bouira                    | PNG1-ERY-FAD, iMLSb | - | - | - | <i>fnbB, clfB, fib, hla, hld, hlg, hlg2</i>                | 2 | NT |
| S280 | Cow milk                    | 02/05/2018 | Milk             | Tizi Ouzou                | PNG1-KMN-TMN        | - | - | - | <i>clfB, fib, sei, hla, hld, hlg, hlg2</i>                 | 1 | NT |
| S282 | Goat milk                   | 26/04/2018 | Milk             | Bejaia (Akbou)            | -                   | - | - | - | <i>clfB, fib, sea, sei, hla, hld, hlg, hlg2</i>            | 1 | NT |
| S283 | Table egg                   | 11/07/2018 | Surface swabbing | Bouira                    | -                   | - | - | - | <i>fnbB, clfB, fib, sea, sei, seg, hla, hld, hlg, hlg2</i> | 1 | NT |
| S284 | Table egg                   | 11/07/2018 | Surface swabbing | Bouira                    | -                   | - | - | - | <i>clfB, fib, sea, sei, hla, hld, hlg, hlg2</i>            | 1 | NT |
| S285 | Table egg                   | 26/04/2018 | Surface swabbing | Bejaia (Akbou)            | -                   | - | - | - | <i>clfB, fib, sea, sei, hla, hld, hlg, hlg2</i>            | 1 | NT |
| S286 | Table egg                   | 26/04/2018 | Surface swabbing | Bejaia (Akbou)            | -                   | - | - | - | <i>fnbB, clfB, fib, sea, sei, hla, hld, hlg, hlg2</i>      | 3 | NT |
| S288 | Table egg                   | 02/05/2018 | Surface swabbing | Tizi Ouzou                | -                   | - | - | - | <i>fnbA, clfB, fib, sea, sei, hla, hld, hlg, hlg2</i>      | 1 | NT |
| S290 | Aquatic environment (River) | 05/05/2018 | Water            | Jijel                     | -                   | - | - | - | <i>clfB, fib, sea, sei, seg, hla, hld, hlg, hlg2</i>       | 1 | NT |
| S291 | Aquatic environment (Sea)   | 10/05/2018 | Water            | Boumerdes                 | PNG1-KMN            | - | - | - | <i>clfB, fib, sea, sei, hla, hld, hlg, hlg2</i>            | 1 | NT |



|      |                             |            |       |            |   |   |   |   |                                                      |   |    |
|------|-----------------------------|------------|-------|------------|---|---|---|---|------------------------------------------------------|---|----|
| S292 | Aquatic environment (River) | 02/05/2018 | Water | Tizi Ouzou | - | - | - | - | <i>clfB, fib, sea, sei, hla, hlb, hld, hlg, hlg2</i> | 1 | NT |
|------|-----------------------------|------------|-------|------------|---|---|---|---|------------------------------------------------------|---|----|

Penicillin G1 (PNG1), clindamycin (CMN, 2 µg), erythromycin (ERY, 15 µg), fusidic acid (FAD, 10 µg), kanamycin (KMN, 30 µg), minocycline (MNO, 30 µg), ofloxacin (OFX, 5 µg), rifampicin (RIF, 5 µg), iMLSb (inducible macrolide-lincosamide-streptogramin B), TSST (Toxic Shock Syndrome Toxin), *agr* (accessory gene regulator).  
 NT, not tested.
